# Supplementary material for: IGF2BP3 promotes mRNA degradation through internal m7G modification
Source: Nat Commun. 2024 Aug 28;15:7421. doi: 10.1038/s41467-024-51634-w (PMC11358264; doi:10.1038/s41467-024-51634-w)
Supplement: Supplementary file 7 — Source Data [file 41467_2024_51634_MOESM7_ESM.xlsx]

## Sheet: Fig 1
Fig. 1g
		siCtrl			siMETTL1
	HepG2	1	1	1	0.673617	0.692555	0.594604
Fig. 1h
		m7G			m6A
	A172	2.05623	2.20381	3.56771	0.246558	0.088388	0.2267
	LN229	16.4498	15.5625	12.5534	0.356013	0.181747	0.579892
	HepG2	5.93809	6.49802	9.54669	0.109576	0.134904	0.228277
	T98G	1.79005	1.34723	1.52626	0.346277	0.29937	0.503079
	U87MG	13.737	14.8254	14.42	1.02e-06	5.39e-05	1.06e-05
Fig. 1i		Relative expression
	A172	9.25351	9.18959	9.57983
	LN229	2.92817	2.69447	2.88786
	HepG2	5.31474	5.09824	4.16986
	T98G	13.3614	14.723	13.4543
	U87MG	1	1	1

## Sheet: Fig 2
Fig. 2b
			IGF2BP1						IGF2BP2						IGF2BP3
Fig. 2c
		m7G/G (%)
	input	0.028938	0.035041	0.034241
	I1-IP	0.057384	0.064037	0.064291
	I2-IP	0.048908	0.057846	0.053995
	I3-IP	0.059243	0.068334	0.068559
	I1-Flowthrough	0.027405	0.027173	0.028679
	I2-Flowthrough	0.028715	0.027097	0.026527
	I3-Flowthrough	0.028173	0.029171	0.027963

## Sheet: Fig 3
Fig. 3c
		Enrichment folds
	CYRIB	3.34035	3.13834	4.05584
	HUWE1	3.68075	3.63008	2.80889
	BPNT2	6.36429	5.93809	6.49802
	NDRG1	4	4.53154	3.73213
	ZDHHC9	1.91853	1.85318	1.47939
Fig. 3d
	NDRG1
		siCtrl				siIGF2BP1				siIGF2BP3
	0	1	1	1	1	1	1	1	1	1	1	1	1
	3	0.628507	0.61132	0.625132	0.625132	0.779165	0.790041	0.774981	0.693627	0.812252	0.840896	0.832803	0.832803
	6	0.550953	0.528509	0.500774	0.518434	0.76313	0.80107	0.587326	0.583269	0.757858	0.757858	0.74538	0.715016
	ZDHHC9
		siCtrl				siIGF2BP1				siIGF2BP3
	0	1	1	1	1	1	1	1	1	1	1	1	1
	3	0.742262	0.812252	0.713128	0.753789	0.817902	0.907519	0.928023	1.02971	0.768438	0.784584	0.850302	0.930481
	6	0.574349	0.586417	0.583269	0.575239	0.697372	0.732043	0.67466	0.67466	0.687771	0.742262	0.798878	0.804435

## Sheet: Fig 4
Fig. 4b
		Relative m7G level
	CYRIB	6.06287	5.09824	6.1475
	ZDHHC9	2.41162	2.44528	2.36199
	HUWE1	1.6358	1.55833	1.88557
Fig. 4c
	neg			sg
	1	1	1	1	1	1
	0.965936	0.959264	0.918064	0.864537	0.870551	0.837987
	0.858565	0.858565	0.844791	0.806642	0.812252	0.795536
Fig. 4d
		gRNA			gRNA (neg)
	HUWE1	1.37554	1.65864	1.31039	1.00696	0.959264	0.920188
	NDRG1	1.52626	1.68179	1.69349	0.946058	1.08674	1.19748
	BPNT2	1.8025	1.82766	1.79005	1.11729	1.19748	1.1487
	ZDHHC9	2.18859	2.44528	2.25012	1.19748	1.27456	1.23971
Fig. 4e
	neg			sg
	1	1	1	1	1	1
	0.952638	0.888843	0.852635	0.692555	0.757858	0.790041
	0.817902	0.817902	0.817902	0.632878	0.678302	0.742262
Fig. 4f
Fig. 4g
		si Ctrl + OE Ctrl			si EXOSC2 + OE Ctrl			si Ctrl + OE IGF2BP3			si EXOSC2 + OE IGF2BP3
	CYRIB	1	1	1	0.993092	1	1.11342	0.840896	0.840896	0.904379	0.97942	0.913831	1.02101
	BPNT2	1	1	1	1.1487	1.14076	0.917004	0.840896	0.846745	0.882703	1.03527	0.97942	1.02811
	NDRG1	1	1	1	0.95995	1.01469	1.02101	0.801643	0.841498	0.817902	0.883334	0.889478	0.885768
	ZDHHC9	1	1	1	0.959264	0.913831	0.936272	0.858565	0.888843	0.873573	0.939523	0.895025	0.929805

## Sheet: Fig 5
Fig. 5c
	U87MG	si Ctrl			si IGF2BP3
	0	1	1	1	1	1	1
	3	0.913831	0.840896	0.852635	0.895025	0.846745	0.870551
	6	0.707107	0.628507	0.578344	0.846745	0.768438	0.864537
	LN229	si Ctrl			si IGF2BP3
	0	1	1	1	1	1	1
	3	0.870551	0.846745	0.913831	0.882703	0.895025	0.946058
	6	0.619854	0.659754	0.716978	0.82932	0.864537	0.920188
Fig. 5d
		siCtrl			siMETTL1
	LN229	1	1	1	0.697372	0.646176	0.712025
	U87MG	1	1	1	0.650671	0.659754	0.632878
Fig. 5e
		OE Ctrl			OE IGF2BP3
	LN229	1	1	1	0.003331	0.001586	0.002559
	U87MG	1	1	1	0.295248	0.41466	0.450625
Fig. 5f
		si Ctrl			si IGF2BP3
	A172	1	1	1	1.17284	1.46576	1.71713
	T98G	1	1	1	1.81504	1.90528	1.52626
Fig. 5g
	LN229	dcasI3-TP53 neg			dcasI3-TP53 gRNA
		1	1	1	1	1	1
		0.986789	0.952638	0.933033	0.90125	0.864537	0.913831
		0.934275	0.913831	0.864537	0.80107	0.779165	0.784584
	A172	dcasM1-TP53 neg			dcasM1-TP53 gRNA
		1	1	1	1	1	1
		0.965936	0.959264	0.904379	0.907519	0.913831	0.929805
		0.840896	0.858565	0.790041	0.742262	0.737135	0.724471
Fig. 5h
		dcasM1-TP53 neg			dcasM1-TP53 gRNA
	A172	1.17284	1.26576	1.06437	1.94531	2	2.17347
	T98G	1.36604	1.37554	1.24833	3.4822	4.16986	3.29436
Fig. 5i
		dcas-I3 + TP53 gRNA			dcas-Met1 + TP53 gRNA
	A172	0.692555	0.646176	0.788458	0.829319	0.742261	0.806642
	T98G	0.668964	0.687771	0.712025	0.664342	0.747425	0.742262
	LN229	0.801069	0.678302	0.792784
	U87MG	0.692555	0.779164	0.712025
Fig. 5j
			TP53					GAPDH
Fig. 5k
	Hr	dcas-IGF2BP3 + TP53 gRNA (neg)						dcas-IGF2BP3 + TP53 gRNA
	0	1.08132	0.837354	0.941739	1.1942	0.989076	0.956304	1.0061	0.905035	0.93433	1.04712	1.12182	0.985597
	24	1.38787	1.40607	1.40607	1.41942	1.36723	1.34174	1.49468	1.58696	1.58696	1.59868	1.502	1.48735
	48	1.95585	2.00197	2.06023	2.14156	2.1367	2.23016	2.10101	2.24455	2.32658	2.30607	2.37785	2.38517
	72	2.37187	2.5333	2.73115	2.76028	2.79427	2.75785	2.98975	3.09521	2.97363	3.21825	2.75392	3.26952
	96	2.78666	2.87162	2.93231	2.93352	3.03063	3.08282	3.45368	3.36287	3.4361	3.35847	3.39216	3.58844
Fig. 5l
			MGMT					GAPDH
Fig. 5m
	TMZ (μM)	WT						dcas-IGF2BP3 + TP53 gRNA						dcas-IGF2BP3 + TP53 gRNA (neg)
	0	1.08295	1.01109	0.971169	0.960523	0.977822	0.996452	1.09139	0.995343	0.96915	0.923749	0.958673	1.0617	1.00281	0.967099	0.95222	0.981979	1.11491	0.980987
	50	0.956531	0.989798	0.907297	0.956531	0.867376	1.01508	0.977881	0.965658	1.00582	0.770081	0.920256	0.998836	0.95222	0.954204	0.931388	0.879805	0.935356	0.939324
	100	0.947217	0.929918	0.900643	0.941894	0.927257	0.917942	0.949942	0.848661	0.834692	0.80326	0.873108	0.928987	0.873067	0.894685	0.829214	0.84211	0.884765	0.849053
	250	0.878022	0.864715	0.866046	0.891328	0.891328	0.883344	0.832945	0.83993	0.586729	0.770081	0.747381	0.794529	0.808382	0.808382	0.795486	0.773663	0.826238	0.833182
	500	0.678421	0.663784	0.633178	0.621202	0.699712	0.719672	0.522119	0.553551	0.429569	0.464494	0.471478	0.431315	0.581034	0.640432	0.654292	0.669142	0.580044	0.683001
	1000	0.529386	0.506764	0.444223	0.472167	0.493458	0.473497	0.261932	0.237485	0.239232	0.249709	0.240978	0.260186	0.414907	0.386083	0.420672	0.405299	0.428359	0.426437

## Sheet: Sup Fig 1
Sup Fig. 1d
		m6A			m7G
	A172	2.17347	2.07053	2.12874	2.02792	2.02792	1.94531
	LN229	2.94854	2.96905	3.45815	2.9897	3.01049	3.11666
	HepG2	1.94531	1.81504	1.89211	1.47427	1.58008	1.46409
	T98G	1.62451	1.67018	1.58008	2.15846	2.11404	2.04202
	U87MG	2.58471	2.51403	2.39496	1.77768	1.95884	1.98619
Sup Fig. 1e

## Sheet: Sup Fig 2
Sup Fig. 2a
Sup Fig. 2b
			IGF2BP1			IGF2BP2			IGF2BP3
Sup Fig. 2c
			OE Ctrl		OE METTL1
		input	0.022805	0.023834	0.030539	0.031957
		IGF2BP1	0.076308	0.07666	0.104992	0.104665
		IGF2BP2	0.038406	0.043619	0.064416	0.062347
		IGF2BP3	0.079604	0.079447	0.111571	0.113777
Sup Fig. 2d

## Sheet: Sup Fig 4
Sup Fig. 4a
Sup Fig. 4f
	CYRIB	si Ctrl				si IGF2BP1				si IGF2BP3
	0	1	1	1	1	1	1	1	1	1	1	1	1
	3	0.747425	0.673617	0.836381	0.796768	0.846745	0.90125	0.902646	0.934478	0.823591	0.82932	0.838596	0.874208
	6	0.668964	0.615572	0.660776	0.693627	0.840896	0.876606	0.848056	0.859895	0.80107	0.823591	0.898785	0.844429
	HUWE1	si Ctrl				si IGF2BP1				si IGF2BP3
	0	1	1	1	1	1	1	1	1	1	1	1	1
	3	0.664343	0.607097	0.603837	0.583269	0.812252	0.806642	0.780371	0.96075	0.747425	0.784584	0.798878	0.81003
	6	0.628507	0.598739	0.511297	0.390186	0.795536	0.806642	0.575239	0.571265	0.68302	0.68302	0.676447	0.657949
	BPNT2	si Ctrl				si IGF2BP1				si IGF2BP3
	0	1	1	1	1	1	1	1	1	1	1	1	1
	3	0.535887	0.543367	0.67	0.67	0.598739	0.68302	0.836381	0.796768	0.80107	0.697372	0.936953	0.880288
	6	0.469761	0.420448	0.544209	0.57924	0.574349	0.607097	0.591411	0.575239	0.835088	0.840896	0.862172	0.750564

## Sheet: Sup Fig 5
Sup Fig. 5f
		shNC				shMETTL3
		siCtrl		si IGF2BP3		siCtrl		si IGF2BP3
	HUWE1	1	1	1	1	1	1	1	1
		0.876606	0.888843	0.926588	0.920188	0.806642	0.876606	0.887519	0.907519
		0.628507	0.578344	0.846745	0.817902	0.641713	0.61132	0.835088	0.835088
	ZDHHC9	1	1	1	1	1	1	1	1
		0.870551	0.835088	0.993092	0.90125	0.835088	0.768438	0.852635	0.864537
		0.590496	0.578344	0.790041	0.757858	0.602904	0.566442	0.716978	0.721965
	CYRIB	1	1	1	1	1	1	1	1
		0.858565	0.790041	0.926588	0.926588	0.80107	0.82932	0.907519	0.90125
		0.598739	0.578344	0.823591	0.888843	0.598739	0.594604	0.817902	0.907519
	NDRG1	1	1	1	1	1	1	1	1
		0.876606	0.895025	0.939523	0.986233	0.926588	0.876606	0.959264	0.97942
		0.650671	0.712025	0.840896	0.895025	0.721965	0.673617	0.864537	0.757858
	BPNT2	1	1	1	1	1	1	1	1
		0.598739	0.646176	0.76313	0.846745	0.835088	0.80107	0.835088	0.840896
		0.473029	0.463294	0.632878	0.650671	0.582367	0.543367	0.726986	0.716978

## Sheet: Sup Fig 6
Sup Fig. 6a
		neg			sg
	HUWE1	1	1	1	1	1	1
		0.972655	0.972655	0.923382	0.752623	0.757858	0.871557
		0.888843	0.90125	0.904379	0.692555	0.687771	0.743979
	ZDHHC9	neg			sg
		1	1	1	1	1	1
		1.02811	0.952638	0.790041	0.76313	0.882703	0.876606
		0.784584	0.76313	0.742262	0.570382	0.558644	0.650671
Sup Fig. 6b
	HUWE1	neg			sg
		1	1	1	1	1	1
		0.933033	0.946058	0.946058	0.952638	0.959264	1.05336
		0.806642	0.858565	0.885768	0.876606	0.895025	0.817902
	CYRIB	neg			sg
		1	1	1	1	1	1
		0.876606	0.913831	0.920188	0.939523	0.97942	0.913831
		0.823591	0.888843	0.907519	0.888843	0.907519	0.895025
	ZDHHC9	neg			sg
		1	1	1	1	1	1
		0.97942	1.02811	0.913831	0.959264	0.986233	0.952638
		0.687771	0.747425	0.737135	0.716978	0.712025	0.732043
Sup Fig. 6c
		gRNA			negRNA
	HUWE1	2.86791	3.20428	2.73208	1	1	1
	NDRG1	2.28153	1.98619	2.25012	1	1	1
	BPNT2	2.44528	1.8025	2.26577	1	1	1
	ZDHHC9	4.21008	4.01068	3.03953	1	1	1
Sup Fig. 6d
	HUWE1	neg			sg
		1	1	1	1	1	1
		0.959264	0.907519	0.933033	0.90125	0.926588	0.913831
		0.806642	0.858565	0.849685	0.742262	0.742262	0.721965
	BPNT2	neg			sg
		1	1	1	1	1	1
		0.952638	0.959264	0.877619	0.858565	0.876606	0.870551
		0.870551	0.864537	0.838956	0.80107	0.817902	0.795536
	NDRG1	neg			sg
		1	1	1	1	1	1
		0.888843	0.965936	0.941696	0.823591	0.76313	0.806642
		0.913831	0.895025	0.895025	0.757858	0.757858	0.716978
Sup Fig. 6e
		siCtrl				siMETTL1
dCas-IGF2BP3		sg		neg		sg		neg
	HUWE1	1	1	1	1	1	1	1	1
		0.864537	0.858565	0.993092	1.04247	0.946058	0.986233	0.864537	0.907519
		0.61132	0.598739	0.732043	0.707107	0.854683	0.835644	0.795536	0.812252
		sg		neg		sg		neg
	CYRIB	1	1	1	1	1	1	1	1
		0.790041	0.812252	0.795536	0.742262	1.00696	0.978289	1.01396	0.993092
		0.650671	0.655197	0.823591	0.779165	0.895025	0.986233	0.986233	0.97942
		sg		neg		sg		neg
	ZDHHC9	1	1	1	1	1	1	1	1
		0.895025	0.888843	0.840896	0.858565	0.913831	0.870551	0.864537	0.888843
		0.650671	0.659754	0.835088	0.846745	0.864537	0.895025	0.812252	0.806642
Sup Fig. 6f
		siCtrl				siIGF2BP3
dCas-METTL1		sg		neg		sg		neg
	HUWE1	1	1	1	1	1	1	1	1
		0.817902	0.823591	0.946058	1.04972	0.768438	0.795536	0.852635	0.817902
		0.602904	0.598739	0.702222	0.697372	0.80107	0.870551	0.80107	0.840896
	NDRG1	sg		neg		sg		neg
		1	1	1	1	1	1	1	1
		0.726986	0.747425	0.895025	0.972655	0.90125	0.870551	1.02506	0.876606
		0.63728	0.628507	0.742262	0.716978	0.823591	0.852635	0.895025	0.82932
	BPNT2	sg		neg		sg		neg
		1	1	1	1	1	1	1	1
		0.732043	0.732043	1.04972	1	0.812252	0.784584	1.02101	0.972655
		0.574349	0.63728	0.90125	0.846745	0.76313	0.737135	0.790041	0.790041
Sup Fig. 6g
		shNC				shMETTL3
dCas-IGF2BP3		neg		sg		neg		sg
	HUWE1	1	1	1	1	1	1	1	1
		0.895025	0.926588	0.852635	0.895025	0.993092	1.02811	0.659754	0.687771
		0.888843	0.846745	0.702222	0.726986	0.926588	0.846745	0.574349	0.607097
		neg		sg		neg		sg
	CYRIB	1	1	1	1	1	1	1	1
		0.926588	1.08674	0.939523	0.90125	0.784584	0.870551	0.673617	0.650671
		0.888843	0.90125	0.779165	0.737135	0.757858	0.806642	0.646176	0.632878
		neg		sg		neg		sg
	ZDHHC9	1	1	1	1	1	1	1	1
		0.965936	1.03527	0.876606	0.888843	0.965936	0.972655	0.823591	0.817902
		0.946058	0.864537	0.812252	0.817902	0.888843	0.835088	0.768438	0.747425
Sup Fig. 6h
		shNC				shMETTL3
dCas-METTL1		neg		sg		neg		sg
	HUWE1	1	1	1	1	1	1	1	1
		0.907519	0.888843	0.76313	0.773782	0.858565	0.895025	0.864537	0.747425
		0.840896	0.864537	0.716978	0.697372	0.768438	0.779165	0.712025	0.664343
	NDRG1	neg		sg		neg		sg
		1	1	1	1	1	1	1	1
		0.895025	0.888843	0.757858	0.737135	0.846745	0.895025	0.732043	0.742262
		0.895025	0.858565	0.63728	0.678302	0.852635	0.864537	0.673617	0.692555
	BPNT2	neg		sg		neg		sg
		1	1	1	1	1	1	1	1
		0.858565	0.895025	0.790041	0.737135	0.817902	0.852635	0.712025	0.697372
		0.823591	0.80107	0.687771	0.68302	0.80107	0.806642	0.594604	0.632878

[truncated: 3 more sheets: Sup Fig 7, Sup Fig 9, Sup Fig 10]
